# Supplementary material for: Phosphatidylinositol-phospholipase C3 negatively regulates the hypersensitive response via complex signaling with MAP kinase, phytohormones, and reactive oxygen species in Nicotiana benthamiana
Source: PubMed Central journal article supplement (PMC10433933; doi:10.1093/jxb/erad184), 2023-05-16
Supplement: erad184_suppl_supplementary_figures_s1-s7_tables_s1-s2.pdf [file erad184_suppl_supplementary_figures_s1-s7_tables_s1-s2.pdf]

Fig. S1

NbPLC3-1 (Niben101Scf02280) ATTCTTTTATACGCGGAATAACCAAAAATTTTATACCTTCCCATTCTCTTAAGCAAAAA-----AACCGTACTTCTA-ACAATCACATAAAATCATTTCCTCTC 104  
 NbPLC3-2 (Niben101Scf04093) ---CAACAATCCATT--ATAATCCC---AATTTTTATACCTTGCATTTTCTTAAGCAAAAAAACAAGAAAGAAAAACCGTTATCTCTCATATCACATAAAATCATTTCCTCTC 112

NbPLC3-1 (Niben101Scf02280) CTCAAAAAATCATCTCTCCGTTTTCCGTTTTCC-----TCTTTCAAACAATGTGAGACAGAGCTACAGAGTCTGTTTCTGTTTCCGCGCGGTTCCGGGTAGTCGCCGCCGAGG 217  
 NbPLC3-2 (Niben101Scf04093) CTCACAATAATCATCCCTCCGTTTTCCGTTTTCTCTTTCAAACAATGTGAGACAGAGCTACAGAGTCTGTTTCTGTTTCCGCGCGGTTCCGAGTAGTCGCCGCCGAGG 232

NbPLC3-1 (Niben101Scf02280) CTCACGCGGATGTAAGAATTTTCAATAGATACTCCGATAACCGGATTAATGAATGACAGAAACCTACAACGATCTTAATTTGAGGTTGAGAAAGAGAAAAATGCGAGTTTAGAGGATG 337  
 NbPLC3-2 (Niben101Scf04093) CTCGCGCGGATGTAAGAATTTTCAATAGATACTCCGATAACCGGATTAATGAATGACAGAAACCTACAACGATCTTAATTTGAGGTTGAGAAAGAGAAAAATGCGAGTTTAGAGGATG 352

NbPLC3-1 (Niben101Scf02280) CTCATGGTATTATG-----AAT-AATCTTCATG-ACCT-----TAAAGTCTTTAA---TATTTTTTCATCGGAGAGGTT 400  
 NbPLC3-2 (Niben101Scf04093) CTCAGGGTATTTCGTCTCGCTTCTGCAATGAACTTGTGCAAGTCAAGTCAAGTGGTAGTACGCCAAGTTGAAACAAAATCACTGCTCTGCTTTTCAA-GCAGCAACT 471

NbPLC3-1 (Niben101Scf02280) TACATC-----TTGACGCATTTTTAAGTAT--CTTTTTGTCTGATATTA--ATC-CTCCTATCAATCTTAACCGCGGATTCACCATGATATGAATGAGCCTTTGTCTCAT 501  
 NbPLC3-2 (Niben101Scf04093) TACAGCATATGTTGAAAAGATTTATGAAATTTATAGGATAACTTGAAGAGGAGTTGGGATCACTCTTTC---CTTATGCTCCAGATTCACCATGATATGAATGAGCCTTTGTCTCAT 588

NbPLC3-1 (Niben101Scf02280) TACTTCATATACACAGGACATAAATCTTATCTAACTGGGAATCAACTAAGTAGTGATTCAGTGTATTTCCATAAATCAAGCCCTGCACCGAGGTGACGAGTAATGAATTTGGATATA 621  
 NbPLC3-2 (Niben101Scf04093) TACTTCATATACACAGGACATAAATCTTATCTAACTGGGAATCAACTAAGTAGTGATTCAGTGTATTTCCATAAATCAAGCCCTGCACCGAGGTGACGAGTAATGAATTTGGATATA 708

NbPLC3-1 (Niben101Scf02280) TGGCCAAATTCGCCAAAGATGATGGAAATTTTGCATGGAGCAACTTGACCACTCCAGTTGCGCTCATCAAAATGCTAAAGTCTATCAAGGAACATGCTTTTTCTGTATCTGAATAT 741  
 NbPLC3-2 (Niben101Scf04093) TGGCCAAATTCGCCAAAGATGATGGAAATTTTGCATGGAGCAACTTGACCACTCCGTTGCGCTCATCAAAATGCTAGAGTCTATAAGGAACATGCTTTTTACTGTATCAGAGTAT 828

NbPLC3-1 (Niben101Scf02280) CCTGTGTAAATAAACAATGAAAGTCACTAACTCAAGATCTTCAGGCAAAAGTTGCGGAGATGATCACTCAAAATTTGGAGACATGCTTTTTCTCCCGATTCTGTTTGAAGGATTTCC 861  
 NbPLC3-2 (Niben101Scf04093) CCTGTGTGGTAAACACTTGAAGATCAATTTAAACCCAGATCTTCAAGCAAAAGTTGACAGATGATCACTCAAAATTTGGAGACATGCTTTTTCTCCCGATTCTGTTTGAAGGATTTCC 948

NbPLC3-1 (Niben101Scf02280) CCCTCCCCGAATCACTGAAAAGACGCGTTTTGATATCAACTAAGCCGCCAAAAGATATCTTCAGCGAAGGAAGTTAAGGAAAAAGACTCGAAGAAAGAACGGATCACCTGATACA 981  
 NbPLC3-2 (Niben101Scf04093) CCCTCCCCGAATCTCTGAAAAGACGCTTCTGATATCAACTAAGCCGCCAAAAGATATCTTCAGCGAAGGAAGTTAAGGAAAAAGACTCGAAGAAAGAACGGATCACCTGATACA 1068

NbPLC3-1 (Niben101Scf02280) GAAGCTTTGGGAAAGGAAGTTTCAGACCTTAAAGCCAGATACAATGATAAG---GATGATTTCTGATGATGGAGTAGTGAAGTGAATTAAGCGATGAAGGAGATCCCAATTCACAG 1098  
 NbPLC3-2 (Niben101Scf04093) GAAGCTTTGGGAAAGGAAGTTTCAGACCTTAAAGCCAGATACAATGATAAG---GATGATTTCTGATGATGGAGTAGTGAAGTGAATTAAGCGATGAAGGAGATCCCAATTCACAG 1188

NbPLC3-1 (Niben101Scf02280) CAAAATGTAGCACCAGAATACAACGCTTTAATTTGCCATTCATGCTGAAAAGGAAAAGTGGACTGTGATTTGGCTGAGGGTTGATCCTGATAAAGTAAGACGCTTAGCTTGAAGTGA 1218  
 NbPLC3-2 (Niben101Scf04093) CAAA-TGTCGACACGAATACA-----TATGCTGAAAAGGAAAAGTGGATTTGTGATTTGGCTGAGGGTTGATCCTGATAAAGTAAGACGCTTAGCTTGAAGTGA 1290

NbPLC3-1 (Niben101Scf02280) CAAGAATTTGAAAAGGCTGTAGTTACTCATGAAAAGAAAATATCAGGTTCACTAAGGAAACTTGTGAGAATATACCAAAGGCCATACGTTTTGACTCATTAATACAACCTCTT 1338  
 NbPLC3-2 (Niben101Scf04093) CAAGAATTTGAAAAGGCTGTAGTTACTCATGAAAAGAAAATATCAGGTTCACTAAGGAAACTTGTGAGAATATACCAAAGGCCATACGTTTTGACTCATTAATACAACCTCTT 1407

NbPLC3-1 (Niben101Scf02280) GTTGATGGGCGCATGGAGCTCAAAATGGTGCATTAATATGCAAGGCTATGGAAGATCACTTTGGTAAATGATGATGTTTCAAGTCAAAATGGTGGTTGTGGATATGTTAAGAAACCA 1458  
 NbPLC3-2 (Niben101Scf04093) GTTGATGGGCGCATGGAGCTCAAAATGGTGCATTAATATGCAAGGCTATGGAAGATCACTTTGGTAAATGATGATGTTTCAAGTCAAAATGGTGGTTGTGGATATGTTAAGAAACCA 1527

NbPLC3-1 (Niben101Scf02280) GATATACTATTGAAAGCGGTTCCCAACAATCAGGTTTTCGATCTGAAGCAAAATTTCCAGTCAAAAATCACTTGAAGTGGCCGATTTTATGGTGAAGGATGGTATTATGATTTCAAG 1578  
 NbPLC3-2 (Niben101Scf04093) GATATACTATTGAAAGCGGTTCCCAACAATCAGGTTTTCGATCTGAAGCAAAATTTCCAGTCAAAAATCACTTGAAGTGGCCGATTTTATGGTGAAGGATGGTATTATGATTTCAAG 1589

NbPLC3-1 (Niben101Scf02280) CACACACACTTTGATGCATACTCGCTCCAGATTTCTATGCAAAAGTAGGAATGCGGAGTTCTGGCTGATAATATAATGAAGAAAAAAGACTCTTGAGGACAATTTGGATACCAACT 1698  
 NbPLC3-2 (Niben101Scf04093) -----CTTTAAAGTACATT---TCAAG--TTGGAAGTTAAGATAGGAATGCGCGAGTTCCCGCAGATAATGTAATGAAGAAAAAAGACTGAGGATAAATTTGGATACCAACT 1695

NbPLC3-1 (Niben101Scf02280) TGGGATGAAAAGTTTGTAGTTCCCATTAACAGTTCTGAAATGGCTCTACTTCCGCTGAAAGTTCATGAGTATGATATGCTGAAAAGATGATTTTGTGCGCCAAACTTTGTTACCTGTT 1818  
 NbPLC3-2 (Niben101Scf04093) TGGGATGAAAAGTTTGTAGTTCCCATTAACAGTTCTGAAATGGCTCTACTTCCGCTGAAAGTTCATGAGTATGATATGCTGAAAAGATGATTTTGTGCGCCAAACTTTGTTACCTGTT 1815

NbPLC3-1 (Niben101Scf02280) TCAGAACTAAGCAAGGATCCGAGCAGTTTCACTCCAGCAGGAAAAGGAGGAAATAACAATCTGTGAAAGTCTTATGCGCTTCGAATTTGTCTAACTGTGAGTCCGTTGTTTCTC 1938  
 NbPLC3-2 (Niben101Scf04093) TCAGAACTAAGCAAGGATCCGAGCAGTTTCACTCCAGCAGGAAAAGGAGGAAATAACAATCTGTGAAAGTCTTATGCGCTTCGAATTTGTCTAACTGTGAGTCCGTTGTTTCTC 1934

NbPLC3-1 (Niben101Scf02280) TTTATGTTCTGTGTTTGTGTGGTAAATTTCT-GTATCTTTGTGAGTATGTG-AGATGAGATGTAATAAATATATGTAGTAAGATGTGTGCAAAATATTTTTGGAAAGTTGTCTGTCTCT 2056  
 NbPLC3-2 (Niben101Scf04093) TTTATGTTCTGTGTTTGTGTGGTAAATTTTGTGATCTTTGTGCAAAATGTTTGGTGAAGTGTAAATAAATATATGTGTGTAATAATGTGTGCAAAATATTTTTGGAAAGTTGTCTGTCTCT 2054

NbPLC3-1 (Niben101Scf02280) TTGTAACCTGTG-----GTAAATCTG-----TAAATAGATGTGTGGTAAATATGTGTGAAATTAATTTTTGAAAATTCGTCTCATTTTCATGGTATTTGTAATGCTGCAATCAAG 2165  
 NbPLC3-2 (Niben101Scf04093) TTGTAACCTGTGTAATACATAAGCTCTGAGATGTAATAGATGTAT--GGTAAATGTGTGAAATTA-----TGTCAATTCAGTGGTGGTTATATGCTGCAATCAAA 2156

NbPLC3-1 (Niben101Scf02280) TAAAAATATATGGCGCTAATCACTGGGATTTATTTTATCTTAAGCTTTAGGTGGACAATTAATCTTAATACTACCTGTTTGTGAACAATTCAGGTCGTCGCAATCAATTTGAACA 2285  
 NbPLC3-2 (Niben101Scf04093) TAAAAATATATGGCGCTAATCACTGGGATTTATTTTATCTTAAGCTTTAGGTGGACAATTAATCTTAATACTACCTGTTTGTGAACAATTCAGGTCGTCGCAATCAATTTGAACA 2219

NbPLC3-1 (Niben101Scf02280) CTGCCG 2291  
 NbPLC3-2 (Niben101Scf04093) -----

**Figure S1 Nucleotide sequences of *NbPLC1-1* and *NbPLC1-2*.  
 cDNA fragments used for VIGS experiments are shown with gray backgrounds.**



Fig. S3

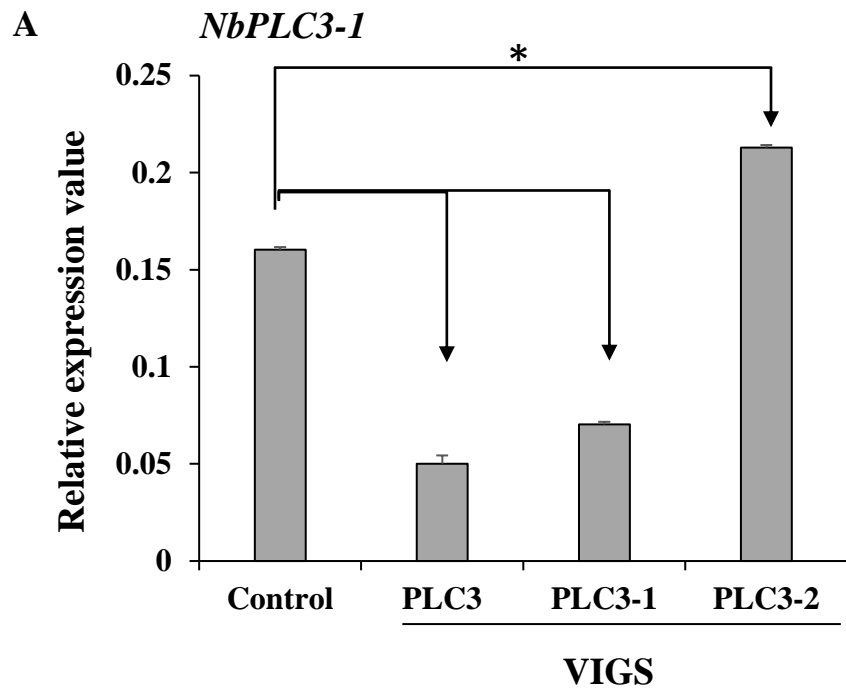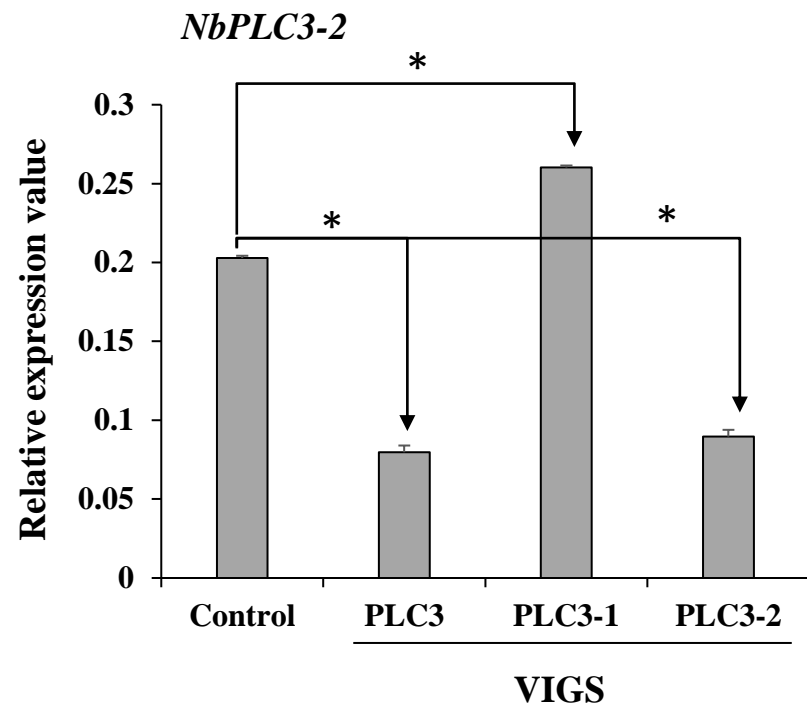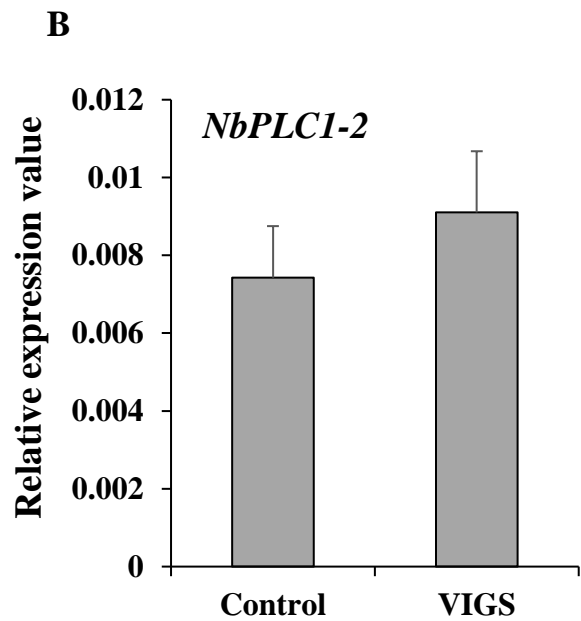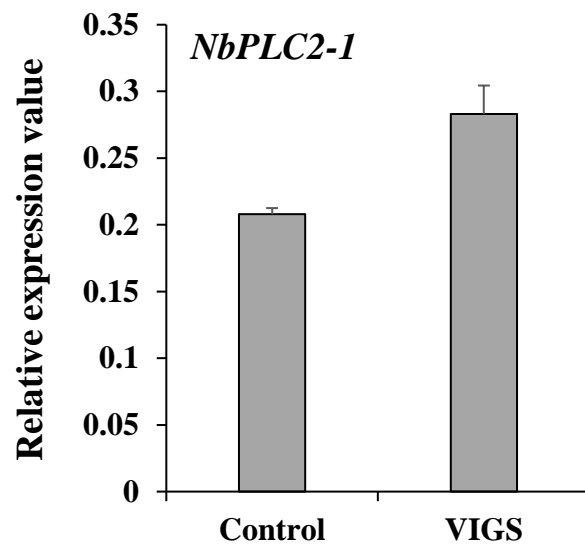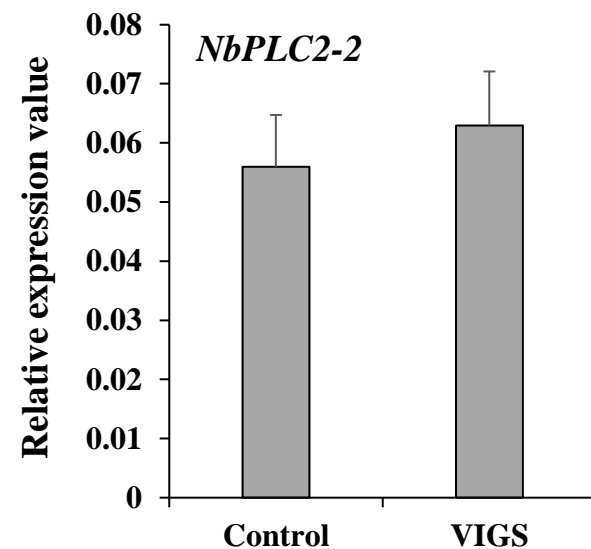

Fig. S3 continued

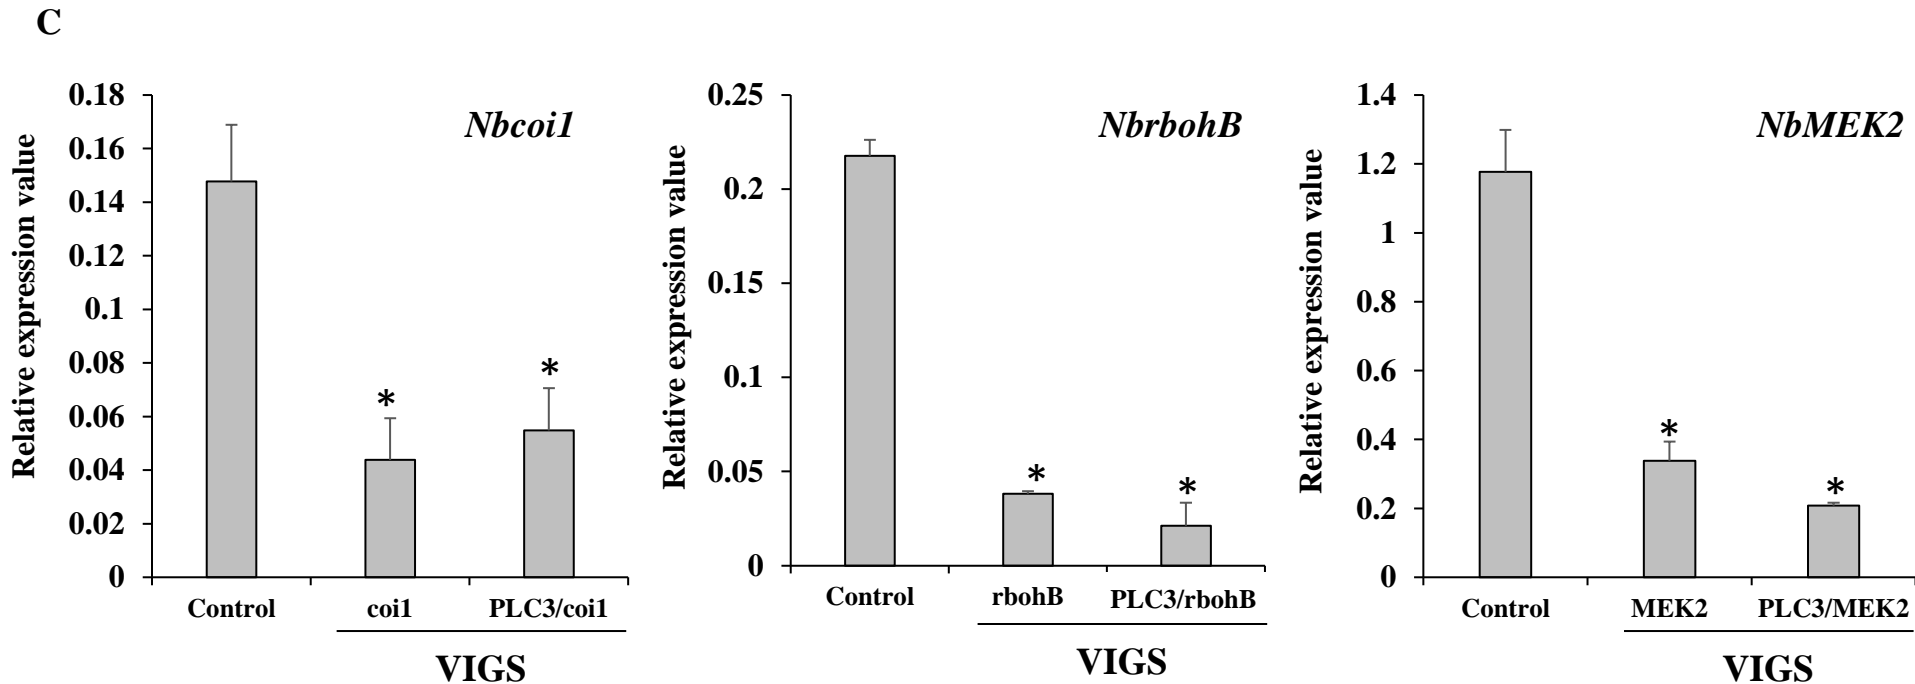

**Estimation of expression value of *NbPLC3-1*, *NbPLC3-2*, *NbPLC1-2*, *NbPLC2-1*, *NbPLC2-2*, *Nbcoi1*, *NbrbohB* and *NbMEK2*.**

(A) Total RNAs were isolated from empty vector control, *NbPLC3-1*- (VIGS:PLC3-1), *NbPLC3-2*- (VIGS:PLC3-2) and both *NbPLC3-1*- and *NbPLC3-2*- (VIGS:PLC3) silenced plants. Transcript levels of *NbPLC3-1* and *NbPLC3-2* were estimated by qRT-PCR. Values represent means  $\pm$  SDs from triplicate experiments. (B) Total RNAs were isolated from empty vector control and both *NbPLC3-1*- and *NbPLC3-2*- (VIGS) silenced plants. Transcript levels of *NbPLC1-2*, *NbPLC2-1* and *NbPLC2-2* were estimated by qRT-PCR. (C) Total RNA was isolated from empty vector control (Control), *Nbcoi1* (coi1) and *NbPLC3s:Nbcoi1* double-knockdown (PLC3/coi1), *NbrbohB* (rbohB) and *NbPLC3s:NbrbohB* double-knockdown (PLC3/rbohB), *NbMEK2* (MEK2) and *NbPLC3s:NbMEK2* double-knockdown (PLC3/MEK2) plants. Transcript levels of *Nbcoi1*, *NbrbohB* and *NbMEK2* were estimated by qRT-PCR. Transcripts relative to the absolute non-treated control were normalized to internal standard genes (NbUbe35/NbNQO). Values represent means  $\pm$  SDs from triplicate experiments.

Fig. S4

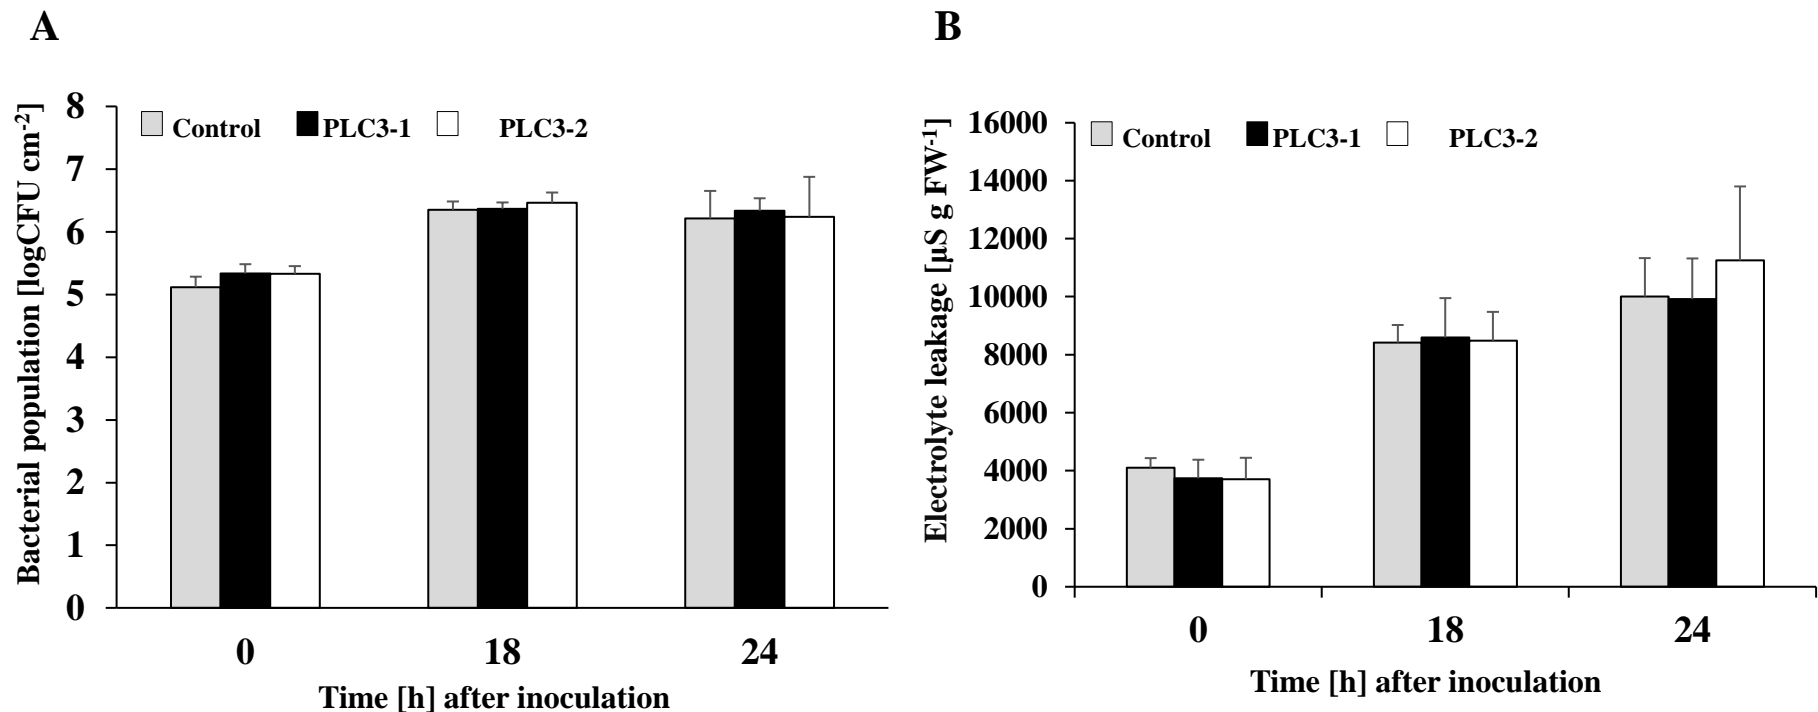

**Figure S4 Effects of *NbPLC3-1*- and *NbPLC3-2*-specific silencing on hypersensitive response (HR) induction by incompatible *Ralstonia solanacearum* 8107.**

Control, *NbPLC3-1*- and *NbPLC3-2*-silenced plant leaves were infiltrated with *R. solanacearum* strain 8107. (A) The bacterial populations of *R. solanacearum* 8107 in Control (gray bar), *NbPLC3-1*-silenced (VIGS; black bar) and *NbPLC3-2*-silenced (VIGS; white bar) plants were determined by plating at specified time points. Values are means  $\pm$  SDs of five replicate experiments. (B) Cell death induced by *R. solanacearum* was determined in Control (gray bar), *NbPLC3-1*-silenced (VIGS; black bar) and *NbPLC3-2*-silenced (VIGS; white bar) plants by measuring the ion conductivity levels. Values represent means  $\pm$  SDs ( $n = 5$ ).

Fig. S5

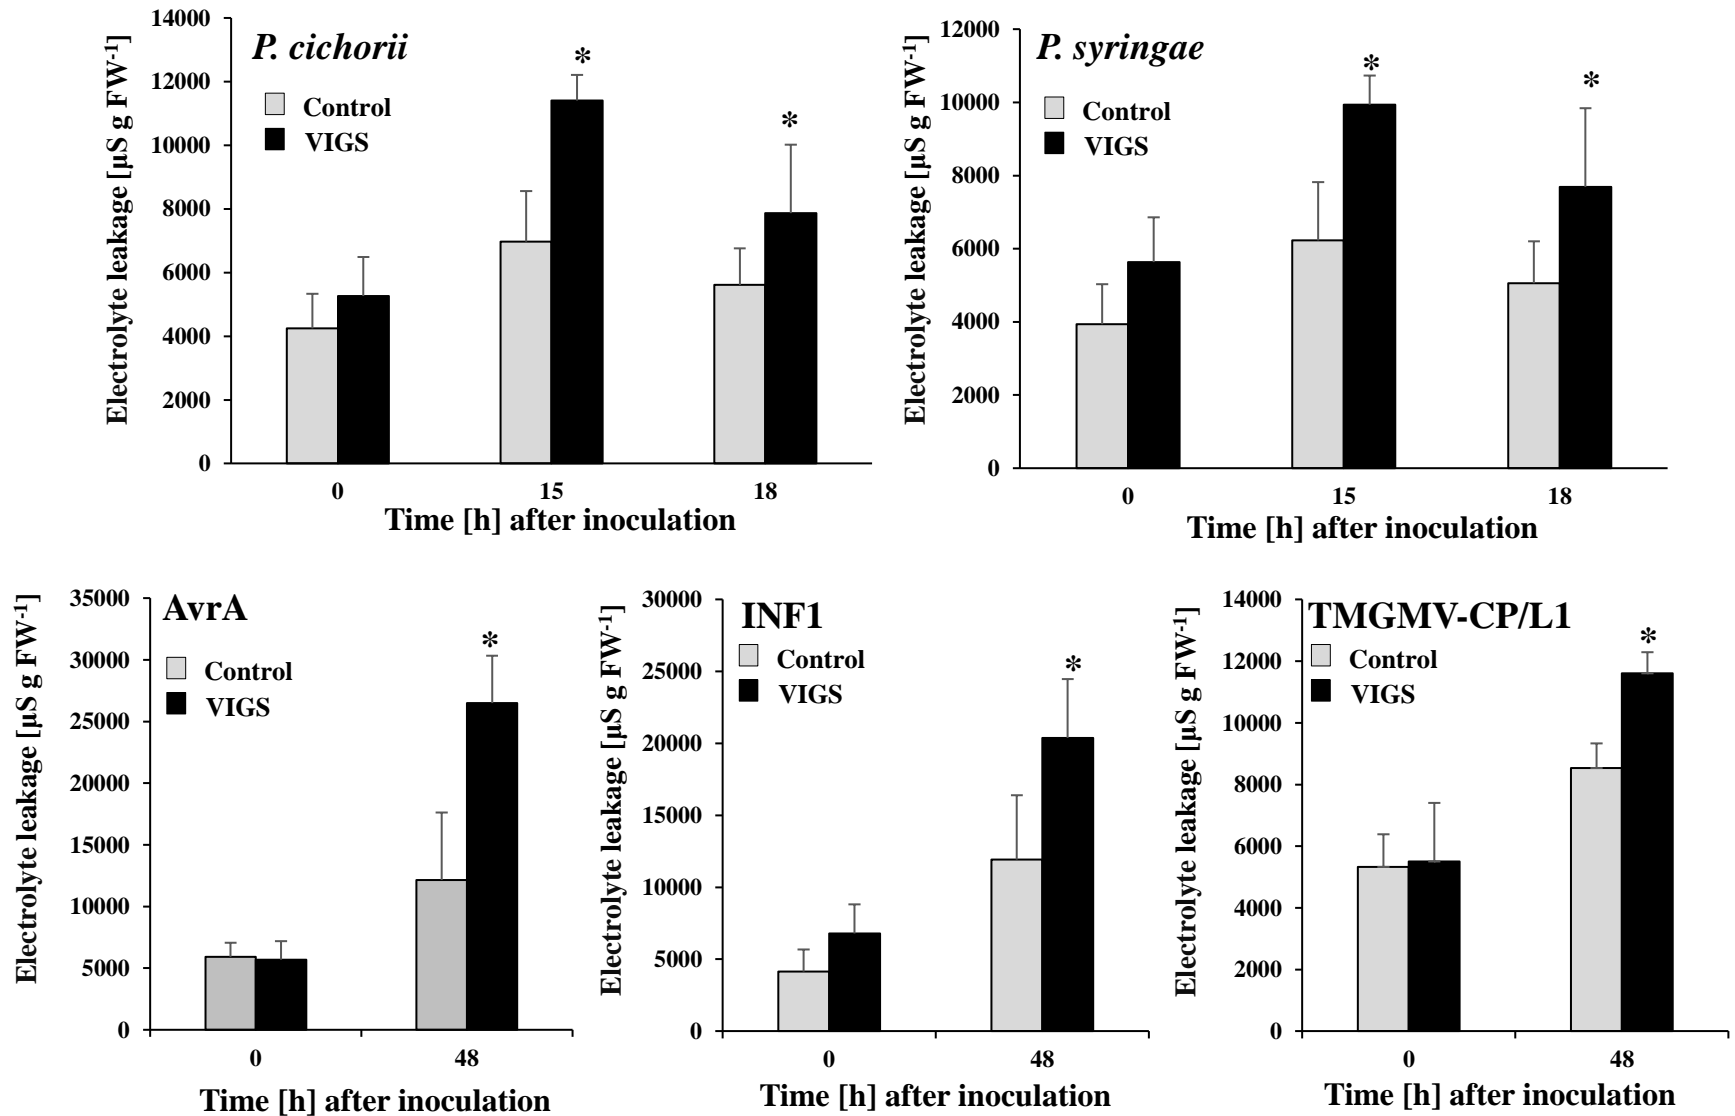

**Figure S5. Effects of *NbPLC3s*-silencing on HR induction by *Pseudomonas cichorii*, *Pseudomonas syringae* pv. *phaseolicola*, AvrA, INF1 and TMGMV-CP with L1.**

Control and *NbPLC3s*-silenced *N. benthamiana* plants were infiltrated with *Pseudomonas cichorii*, *P. syringae*, *Agrobacterium* harboring independently 35S-AvrA (AvrA) and 35S-INF1 (INF1). Cell death induction was determined by measuring the ion conductivity level. Values represent means  $\pm$  SDs ( $n = 5$ ).

Fig. S6

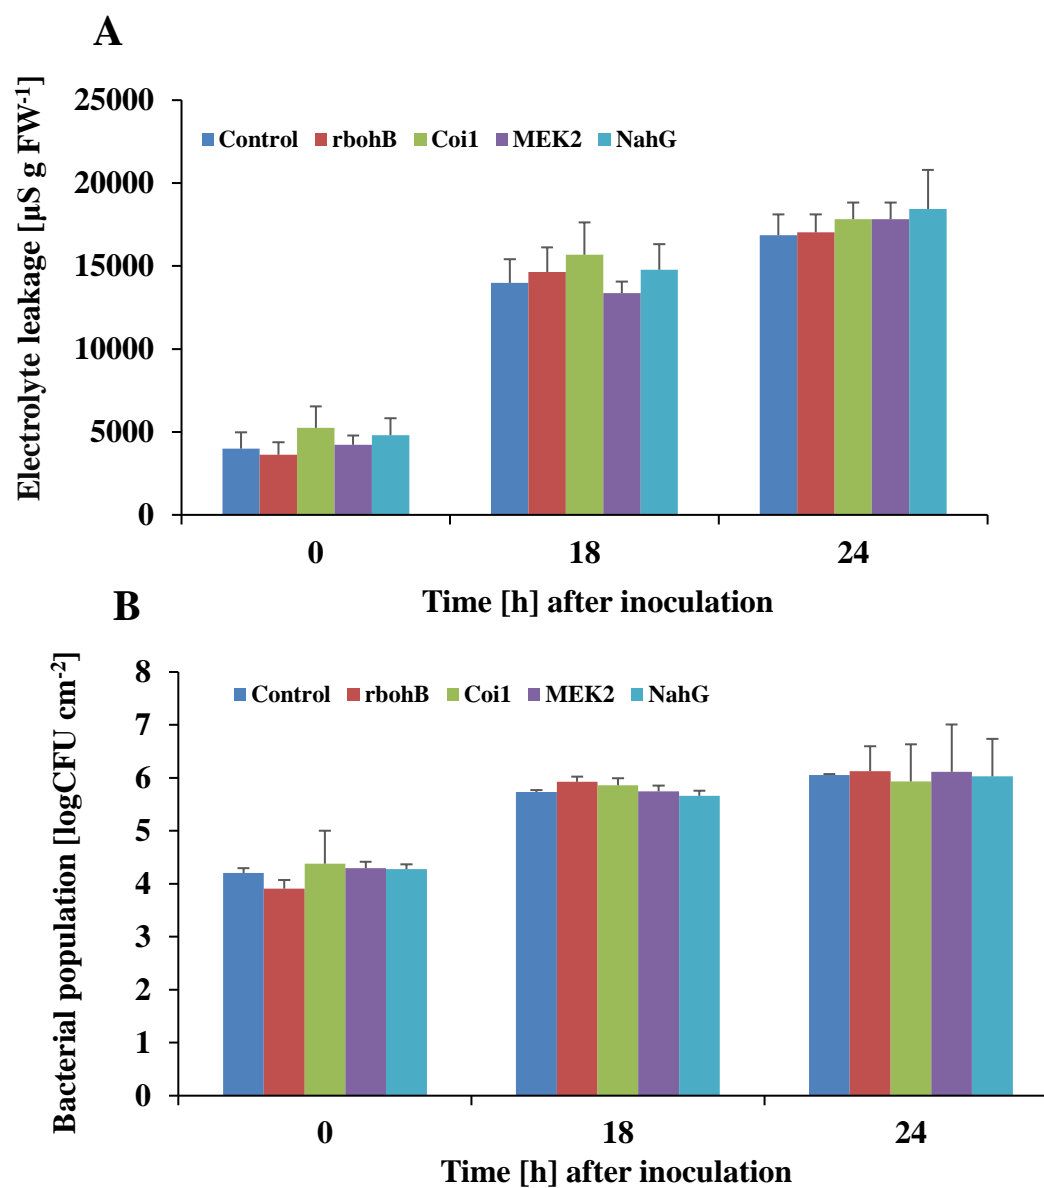

**Figure S6. Bacterial population and hypersensitive cell death induction by incompatible *Ralstonia solanacearum* 8107 in *Nbcoi1*, *NbrbohB* and *NbMEK2*-silenced plants and NahG plant.**

Control, *Ncoi1*-, *NbebohB* and *NbPLCNEK2*-silenced plant leaves were infiltrated with *R. solanacearum* strain 8107. (A) Cell death induced by *R. solanacearum* was determined in Control (gray bar), *NbPLC3-1*-silenced (VIGS; black bar) and *NbPLC3-2*-silenced (VIGS; white bar) plants by measuring the ion conductivity levels. Values represent means  $\pm$  SDs ( $n = 5$ ). (B) The bacterial populations of *R. solanacearum* 8107 in Control (gray bar), *NbPLC3-1*-silenced (VIGS; black bar) and *NbPLC3-2*-silenced (VIGS; white bar) plants were determined by plating at specified time points. Values are means  $\pm$  SDs of five replicate experiments.

Table S1 Primers used in this paper

| Primers      | Sequence [5`-3`]                    | Purpose          | Reference          |
|--------------|-------------------------------------|------------------|--------------------|
| PLC3-1S      | ATTCCTTTTATACGCGGAATAACCAC          | Full length cDNA | This study         |
| PLC3-1A      | CGGCAGTGTTCAAATTGATTTG              | Full length cDNA | This study         |
| PLC3-2S      | CAACAATCCATTATAATCCCAATTTTTATAC     | Full length cDNA | This study         |
| PLC3-2A      | TATCATTTTGTGATACTATAAATTTGAACCTTG   | Full length cDNA | This study         |
| PLC3sVIGSS   | GTCGACGATTACCATGATATGAATGAG         | VIGS vector      | This study         |
| PLC3sVIGSR   | GTCGACGAATCGGGAGAAAACAGCATG         | VIGS vector      | This study         |
| PLC3-1VIGSS  | GTCGACTTGTTCCTTCTTATGTTTCTGTGTT     | VIGS vector      | This study         |
| PLC3-1VIGSA  | GTCGACTTGTCCACCTAAAGCTTAGATAAAT     | VIGS vector      | This study         |
| PLC3-2VIGSS  | GTCGACGTCGTTTGTTCCTTCTTATGTTT       | VIGS vector      | This study         |
| PLC3-2VIGSA  | GTCGACTATCATTTTGTGTTGATACTATAAATTTG | VIGS vector      | This study         |
| RV20         | CAGGAAACAGCTATGAC                   | Sequencing       | Maimbo et al. 2007 |
| M4           | GTTTTCCAGTCACGAC                    | Sequencing       | Maimbo et al. 2007 |
| NbPLC3-1rtpF | GTTCCCATTAACAGTTCCTGAG              | qRT-PCR          | This study         |
| NbPLC3-1rtpR | GCGACTCACAGTTAGACAAAATTCGAAG        | qRT-PCR          | This study         |
| NbPLC3-2rtpF | GTTCCCATTAACAGTTCCTGAA              | qRT-PCR          | This study         |
| NbPLC3-2rtpR | TTTCGAATTTGTCTAACTGTGAGTCGT         | qRT-PCR          | This study         |
| NbPR1rtpF    | GGTCAACACGGCGAAAACC                 | qRT-PCR          | Maimbo et al. 2007 |
| NbPR1rtpR    | GCCTTAGCAGCCGTCATGA                 | qRT-PCR          | Maimbo et al. 2007 |
| NbPR4rtpF    | GGCCAAGATTCTGTGGTAGAT               | qRT-PCR          | Maimbo et al. 2007 |
| NbPR4rtpR    | CACTGTTGTTTGAGTTCCTGTTCTCT          | qRT-PCR          | Maimbo et al. 2007 |
| NbICS1rtpF   | ATTCATGGTCCCTCA                     | qRT-PCR          | Maimbo et al. 2007 |
| NbICS1rtpR   | TTCCTGGTCAAACAT                     | qRT-PCR          | Maimbo et al. 2007 |
| NbORPrtpF    | AGGCACTAAGATTTCTC                   | qRT-PCR          | Maimbo et al. 2007 |
| NbOPRrtpR    | GTTGATCCCATCTTTC                    | qRT-PCR          | Maimbo et al. 2007 |
| Nbhin1rtpF   | CGGTCCACCCGAAGTCAA                  | qRT-PCR          | Maimbo et al. 2007 |
| Nbhin1rtpR   | ACGCCGTCGATGAAGTAGTCA               | qRT-PCR          | Maimbo et al. 2007 |
| NbUbe35rtpF  | CTTCAGATTTCGACCCGTTCT               | qRT-PCR          | Pombo et al. 2018  |
| NbUbe35rtpR  | CCAATGCTTCGCAATGTTTCTC              | qRT-PCR          | Pombo et al. 2018  |
| NbNQOrtpF    | AAGGCGGTGGTCAAGAAA                  | qRT-PCR          | Pombo et al. 2018  |
| NbNQOrtpR    | CAAACATAACAGCACC GAATG              | qRT-PCR          | Pombo et al. 2018  |
| NbrbohBrtpF  | AACAACCTCGGATACATTAT                | qRT-PCR          | Deang et al. 2015  |
| NbrbohBrtpR  | TGTAAATAGACCAGCCATAA                | qRT-PCR          | Deang et al. 2015  |
| NbMEK2rtpF   | GTGATTGGGCTAGTCTTAT                 | qRT-PCR          | Deang et al. 2015  |
| NbMEK2rtpR   | AGTGGCTGGTCTATTCTGG                 | qRT-PCR          | Deang et al. 2015  |
| Nbcoi1rtpF   | GCTCCACGCGATTACCAACGG               | qRT-PCR          | Song et al. 2020   |
| Nbcoi1rtpR   | CTGCCACCATCTCTTGACACC               | qRT-PCR          | Song et al. 2020   |



Table S2 List of plasmids used in this study.

| Plasmid                | Relevant characteristics                                                                                  | Reference                      |
|------------------------|-----------------------------------------------------------------------------------------------------------|--------------------------------|
| pMD20                  | Cloning vector pMD20, Amp <sup>r</sup>                                                                    | Takara Bio                     |
| pMD-NbPLC3-1 full      | pMD20 carrying full length sequence of <i>NbPLC3-1</i> cDNA                                               | This study                     |
| pMD-NbPLC3-2 full      | pMD20 carrying full length sequence of <i>NbPLC3-2</i> cDNA                                               | This study                     |
| pMD-NbPLC3s            | pMD20 carrying identical sequence of <i>NbPLC3-1</i> and <i>NbPLC3-2</i> fragment for VIGS                | This study                     |
| pMD-NbPLC3-1           | pMD20 carrying <i>NbPLC3-1</i> fragment for VIGS                                                          | This study                     |
| pMD-NbPLC3-2           | pMD20 carrying full length <i>NbPLC3-2</i> fragment for VIGS                                              | This study                     |
| pPVX201                | pPVX binary vector, Km <sup>r</sup>                                                                       | Baulcombe <i>et al.</i> , 1995 |
| pPVXPLC3s              | pPVX binary vector containing identical sequence of <i>NbPLC2-1</i> and <i>NbPLC3-2</i> fragment for VIGS | This study                     |
| pPVXPLC3-1             | pPVX binary vector containing PLC3 -1 cDNA fragment for VIGS                                              | This study                     |
| pPVXPLC3-2             | pPVX binary vector containing PLC3 -2 cDNA fragment for VIGS                                              | This study                     |
| P35S-AvrA              | pMDC32-derived plasmid that contains the full-length <i>avrA</i>                                          | Poueymiro <i>et al.</i> 2009   |
| P35S-INF1              | pGR106 binary vector carrying <i>PR1a:Inf1</i> fusion gene                                                | Huitema <i>et al.</i> , 2005   |
| P35S-MEK <sup>DD</sup> | pGreen binary vector carrying constitutive active form of MEK                                             | Katou <i>et al.</i> 2003       |
| P35S-TMGMV-CP          | pRI101-AN vector carrying coat protein gene from TMGMV                                                    | Gupta <i>et al.</i> 2013       |
| P35S-L1                | pRI101-AN vector carrying <i>L1</i> gene from papper                                                      | Gupta <i>et al.</i> 2013       |
